3. Riess JG, Krafft MP: Fluorinated materials for in vivo oxygen transport (blood substitutes), diagnosis and drug delivery. *Biomaterials* 1998; 19:1529-39
4. Fuhrman BP, Paczan PR, DeFrancis M: Perfluorocarbon-associated gas exchange. *Crit Care Med* 1991; 19:712-22
5. Hirschl RB, Tooley R, Parent A, Johnson K, Bartlett RH: Evaluation of gas exchange, pulmonary compliance, and lung injury during total and partial liquid ventilation in the acute respiratory distress syndrome. *Crit Care Med* 1996; 24:1001-8
6. Hirschl RB, Conrad S, Kaiser R, Zwischenberger JB, Bartlett RH, Booth F, Cardenas V: Partial liquid ventilation in adult patients with ARDS—a multicenter phase I-II trial. *Ann Surg* 1998; 228:692-700
7. Hirschl RB, Pranikoff T, Wise C, Overbeck MC, Gauger P, Schreiner RJ, Dechert R, Bartlett RH: Initial experience with partial liquid ventilation in adult patients with the acute respiratory distress syndrome. *JAMA* 1996; 275:383-9
8. Leach CL, Greenspan JS, Rubenstein SD, Shaffer TH, Wolfson MR, Jackson JC, DeLemos R, Fuhrman BP: Partial liquid ventilation with perflubron in premature infants with severe respiratory distress syndrome. *N Engl J Med* 1996; 335:761-7
9. Quintel M, Hirschl RB, Roth H, Loose R, van Ackern K: Computer tomographic assessment of perfluorocarbon and gas distribution during partial liquid ventilation for acute respiratory failure. *Am J Respir Crit Care Med* 1998; 158:249-55
10. Doctor A, Ibla JC, Grenier BM, Zurakowski D, Ferretti ML, Thompson JE, Lilliehei CW, Arnold JH: Pulmonary blood flow distribution during partial liquid ventilation. *J Appl Physiol* 1998; 84:1540-50
11. Tutuncu AS, Akpir K, Mulder P, Erdmann W, Lachmann B: Intratracheal perfluorocarbon administration as an aid in the ventilatory management of respiratory distress syndrome. *ANESTHESIOLOGY* 1993; 79:1083-93
12. Kaisers U, Max M, Walter J, Kuhlen R, Pappert D, Falke K, Rossaint R: Partial liquid ventilation with small volumes of FC 3280 increases survival time in experimental ARDS. *Eur Resp J* 1997; 10:1955-61
13. Mrozek JD, Smith KM, Bing DR, Meyers PA, Simonton SC, Connett JE, Mammel MC: Exogenous surfactant and partial liquid ventilation. Physiologic and pathologic effects. *Am J Respir Crit Care Med* 1997; 156:1058-65
14. Steinhorn DM, Leach CL, Fuhrman BP, Holm BA: Partial liquid ventilation enhances surfactant phospholipid production. *Crit Care Med* 1996; 24:1252-6
15. Croce MA, Fabian TC, Patton JH Jr, Melton SM, Moore M, Trentham LL: Partial liquid ventilation decreases the inflammatory response in the alveolar environment of trauma patients. *J Trauma* 1998; 45:273-80
16. Rotta AT, Steinhorn DM: Partial liquid ventilation reduces pulmonary neutrophil accumulation in an experimental model of systemic endotoxemia and acute lung injury. *Crit Care Med* 1998; 26:1707-15

Anesthesiology  
1999; 91:342-4  
© 1999 American Society of Anesthesiologists, Inc.  
Lippincott Williams & Wilkins, Inc.

## Airway Exchange Catheters

### Simple Concept, Potentially Great Danger

AIRWAY exchange catheters (AEC) can be used to increase the safety of changing endotracheal tubes (ETTs).<sup>1-3</sup> An AEC is a long, small ID, hollow, semirigid catheter that is inserted through an *in situ* ETT before tracheal extubation. After the ETT is withdrawn over the AEC, the AEC serves as a conduit to administer oxygen manually, by insufflation, or by jet ventilation and as a stylet for repeated intubation. Because the repeated in-

tubation rate is as high as 19% in extubated patients in the surgical ICU,<sup>4-6</sup> the airway management options provided by an AEC are extremely important and are well recognized by the American Society of Anesthesiologists.<sup>7</sup> Many types of AECs have been used<sup>3</sup>; however, the most widely used are the multiple-sized, appropriately adapted, centimeter-depth-marked, commercial variety made by Cook Critical Care (Bloomington, IN), Sheridan Catheter Corporation (Argyle, NY), and CardioMed Supplies (Gormley, Ontario, Canada).

This issue of *ANESTHESIOLOGY* includes a case report<sup>8</sup> that reminds us that although the concept of using an AEC is simple, failure to strictly adhere to a few simple principles and clinical details can result in life-threatening complications. These complications can be divided into two broad categories: (1) barotrauma resulting from air entry exceeding air exit (e.g., as in the case report in this issue) and (2) failure to successfully pass the new ETT over the AEC.

This Editorial View accompanies the following article:  
Baraka AS: Tension pneumothorax complicating jet ventilation *via* a Cook airway exchange catheter. *ANESTHESIOLOGY* 1990; 91:557-8.

Accepted for publication April 6, 1999.

Key words: Barotrauma; endotracheal tube; laryngoscopy; jet stylet; jet ventilation; pneumothorax.

When air entry exceeds air exit, the inevitable sequence of events consists of lung hyperinflation, tension pneumothorax, pneumomediastinum, and subcutaneous emphysema. This will occur whenever air entry is relatively great and the space for air exit is relatively small. Air entry with jet ventilation through an AEC initially should be limited by presetting the jet ventilator at 25 pounds per square inch (psi) by using an additional in-line regulator and by limiting inspiratory time to less than 1 s.<sup>9</sup> For even the smallest AECs, a 1-s inspiratory time at 25 psi with a inspired oxygen fraction near 1.0 (air entrainment is minimal when a long catheter is placed in the trachea)<sup>10</sup> will provide life-sustaining ventilatory support.<sup>10,11</sup> Using a jet ventilator with an additional in-line regulator allows for breath-by-breath increases in tidal volume when clinical judgment indicates this is necessary.

If the equivalent annular air exit space that surrounds the AEC is less than a 4-mm ID ETT, ventilation will not be possible because exhalation time will become markedly prolonged.<sup>12</sup> Figure 1 shows that the number of ETT-AEC combinations is limited wherein the annular space around the AEC exceeds this minimally acceptable limit.<sup>13</sup> Thus, jet ventilation through an AEC should not be used when the ETT-AEC combination is in the white area of figure 1 (which includes the ETT-AEC combination used in the case report in this issue of the journal). In addition, when jetting through an AEC that is placed inside the trachea alone (rather than inside an ETT), the natural airway must be kept maximally patent with bilateral jaw thrust and oropharyngeal or nasopharyngeal (or both) airways. Finally, the AEC user must be cognizant of the depth of insertion of an AEC; not only does increasing the depth of insertion directly increase the risk of perforation of the tracheobronchial tree<sup>14,15</sup> but it also progressively decreases the annular air exit space surrounding the AEC. A prudent rule to follow is never to allow the centimeter calibration on the AEC to exceed a depth of 26 cm in an adult and never to insert an AEC when resistance is encountered. Two perforations of the tracheobronchial tree have been reported, and in both cases the tear was beneath the carina.<sup>14,15</sup>

Given the finding that even experienced users of AECs can have an 11% incidence (in 5 of 45 instances) of barotrauma when the AEC is used with 50 psi jet ventilation,<sup>3,16</sup> and even one instance of barotrauma has been reported at 20 psi,<sup>17</sup> the barotrauma considerations of low psi values, short inspiratory time, long expiratory time, and avoidance of excessive depth of insertion are extremely important. In addition, the anesthesia pro-

### FUNCTIONAL SIZE EQUIVALENT > 4mm ID TUBE AND CLINICAL RECOMMENDATION FOR ETT/AEC STYLET COMBINATIONS

|               |     | AIRWAY EXCHANGE CATHETER                 |                                         |        |       |
|---------------|-----|------------------------------------------|-----------------------------------------|--------|-------|
|               |     | NONE                                     | SMALL                                   | MEDIUM | LARGE |
| ETT I.D. (mm) | 4.0 |                                          |                                         | ⊗      | ⊗     |
|               | 5.0 |                                          | Less than 4mm ID TUBE<br>UNSATISFACTORY |        |       |
|               | 6.0 |                                          |                                         |        |       |
|               | 7.0 |                                          |                                         |        |       |
|               | 8.0 | Greater than 4mm ID TUBE<br>SATISFACTORY |                                         |        |       |
|               | 9.0 |                                          |                                         |        |       |

UNSATISFACTORY   
  SATISFACTORY   
 ⊗ PHYSICALLY IMPOSSIBLE

Fig. 1. Recommendations for endotracheal tube (ETT)-airway exchange catheter (AEC) combinations for functional size equivalent of annular space around the AEC when its inner diameter is more than 4 mm. (Modified with permission from Takata *et al.*<sup>13</sup>)

vider must be vigilant in keeping the upper airway maximally patent and must not use jet ventilation during phonation.

The risk of failure to pass an ETT over an AEC can be minimized greatly if a laryngoscope is used concomitantly whenever possible. Optimal laryngoscopy will help to clear the supraglottic pathway the ETT must take over the AEC and may allow the endoscopist to visualize or understand where resistance is being encountered and how to address it. Failure of the ETT tip to pass the laryngeal inlet usually occurs because the tip has engaged the right vocal cord or arytenoid; the correct maneuver is a 90-degree counterclockwise rotation of the ETT (which rotates the tip from a 3 o'clock to a 12 o'clock position).<sup>18,19</sup> The risk that an ETT will fail to pass the laryngeal inlet is minimized

when a relatively small ETT and a relatively large AEC are used.

There are many benefits to using an AEC. However, certain principles and details must be appreciated to use it safely and successfully. As with many procedures, simplicity plus an awareness of how to minimize the risk of serious complications is an efficacious combination.

**Jonathan L. Benumof, M.D.**

Professor of Anesthesiology  
Department of Anesthesia (8812)  
University of California at San Diego Medical Center  
San Diego, California  
jbenumof@usc.edu

**References**

1. Bedger RC, Chang JL: A jet stylet endotracheal catheter for difficult airway management. *ANESTHESIOLOGY* 1987; 66:221-3
2. Benumof JL: Management of the difficult airway: With special emphasis on the awake intubation. *ANESTHESIOLOGY* 1991; 75:1087-1110
3. Cooper RM: Extubation and changing endotracheal tubes, *Airway Management: Principles and Practice*. Edited by Benumof JL. Philadelphia, Mosby, 1996, pp 864-85
4. Demling RH, Read T, Lind LJ, Flanagan HL: Incidence and morbidity of extubation failure in surgical intensive care patients. *Crit Care Med* 1988; 16:573-7
5. Tahvanainen J, Salmenpera M, Nikki P: Extubation criteria from weaning from intermittent mandatory ventilation and continuous positive airway pressure. *Crit Care Med* 1983; 11:702-6
6. Dehaven CB, Hurst JM, Branson RD: Evaluation of two different extubation criteria: Attributes contributing to success. *Crit Care Med* 1986; 14:92-4
7. Caplan RA, Benumof JL, Berry FA, Blitt CD, Bode RH, Cheney FW, Connis RT, Guidry OF, Ovassapian A: Practice guidelines for management of the difficult airway. A report by the American Society of Anesthesiologists Task Force on the Management of the Difficult Airway. *ANESTHESIOLOGY* 1993; 78:597-602
8. Baraka AS: Tension pneumothorax complicating jet ventilation via Cook airway exchange catheter. *ANESTHESIOLOGY* 1999; 91:557-8
9. Benumof JL, Gaughan SD: Concerns regarding barotrauma during jet ventilation (letter). *ANESTHESIOLOGY* 1992; 76:1072-3
10. Gaughan SD, Benumof JL, Ozaki G: Quantification of the jet function of a jet stylet. *Anesth Analg* 1992; 74:580-5
11. Gaughan SD, Benumof JL, Ozaki G: Can an anesthesia machine provide for effective jet ventilation? *Anesth Analg* 1993; 76:800-8
12. Dworkin R, Benumof JL, Benumof R, Karagianès TG: The effective tracheal diameter that causes air trapping during jet ventilation. *J Cardiothorac Anesth* 1990; 4:731-6
13. Takata M, Benumof JL, Ozaki G: Confirmation of endotracheal intubation over a jet stylet. *Anesth Analg* 1995; 80:800-5
14. DeLima L, Bishop M: Lung laceration after tracheal extubation over a plastic tube changer. *Anesth Analg* 1991; 73:350-1
15. Seitz PA, Gravenstein N: Endobronchial rupture from endotracheal reintubation with an endotracheal tube guide. *J Clin Anesth* 1989; 1:214-17
16. Cooper RM: The use of an endotracheal ventilation catheter in the management of difficult extubations. *Can J Anaesth* 1996; 43:90-3
17. Cooper RM, Cohen DR: The use of an endotracheal ventilation catheter for jet ventilation during a difficult intubation. *Can J Anaesth* 1994; 41:1196-99
18. Roberts JT: Preparing to use flexible fiberoptic laryngoscope. *J Clin Anesth* 1991; 3:64-74
19. Katsnelson T, Frost EAM, Farcon E, Goldiner PL: When the endotracheal tube will not pass over the flexible fiberoptic bronchoscope (letter). *ANESTHESIOLOGY* 1992; 76:151-2
